# Supplementary material for: Operational definitions of asthma in recent epidemiological studies are inconsistent
Source: Clin Transl Allergy. 2014 Aug 4;4:24. doi: 10.1186/2045-7022-4-24 (PMC4136946; doi:10.1186/2045-7022-4-24)
Supplement: Additional file 5 — Summary of studies with Current asthma definitions that used the International Study of Asthma and Allergies in Childhood (ISAAC) questionnaire (n = 18). [file 2045-7022-4-24-S5.pdf]

**Additional File 5: Summary of studies with Current asthma definitions that used the International Study of Asthma and Allergies in Childhood (ISAAC) questionnaire (n=18).**

| <b>Paper</b>                   | <b>Aim of the study</b>                                                                                                               | <b>Study Setting</b>                                                                                                                                                                                                                                                                  | <b>Methodology</b>                                      | <b>Definition of current asthma</b>                                                                                                                                                                                                                                      |
|--------------------------------|---------------------------------------------------------------------------------------------------------------------------------------|---------------------------------------------------------------------------------------------------------------------------------------------------------------------------------------------------------------------------------------------------------------------------------------|---------------------------------------------------------|--------------------------------------------------------------------------------------------------------------------------------------------------------------------------------------------------------------------------------------------------------------------------|
| <b>Alves GdC, 2012[1]</b>      | To determine the association between community violence and asthma symptoms.                                                          | Population-based sample of children Salvador-Baia, Brazil                                                                                                                                                                                                                             | Brazilian version of ISAAC questionnaire                | Wheeze in the last 12 months and at least one of the following: any lifetime episode of asthma; wheezing during physical exercise; four or more episodes of wheezing in the previous year; or waking at night at least once a week due to wheezing in the previous year. |
| <b>Broms K, 2013[2]</b>        | To make an in-depth analysis of the co-occurrence of possible asthma, allergic rhinitis, eczema, and food allergy.                    | Pre-school based sample of children from Sweden.                                                                                                                                                                                                                                      | ISAAC questionnaire                                     | One of the following 1) Ever had asthma and wheezing in the last 12 months or 2) wheezing 4 times or more during the last 12 months or 3) physician diagnosis and wheezing in the last 12 months or 4) current use of inhalation steroids                                |
| <b>de Farias MRdC, 2010[3]</b> | To assess the prevalence of symptoms of asthma                                                                                        | School-based sample of children and adolescents from Alta Floresta, Brazil.                                                                                                                                                                                                           | Brazilian version of ISAAC I questionnaire              | Wheeze in the last 12 months                                                                                                                                                                                                                                             |
| <b>Dell SD, 2010[4]</b>        | To assess the prevalence of asthma and allergic disease                                                                               | School-based sample of children from Toronto - Ontario, Canada                                                                                                                                                                                                                        | ISAAC I protocol                                        | Ever had asthma and was this confirmed by a doctor and wheeze and/or medication(s) for asthma or wheezing in the past 12 months                                                                                                                                          |
| <b>Delmas MC, 2012[5]</b>      | To estimate the prevalence of asthma                                                                                                  | Data from 3 French national studies were analyzed: the Decennial Health Interview Survey conducted in 2003 among a representative sample of households and 2 surveys conducted among representative samples of schoolchildren from 9th grade in 2003–2004 and 5th grade in 2004–2005. | ISAAC questionnaire                                     | Current wheeze and 1) Ever had an asthma attack or 2) taking medication(s) for asthma or wheezing                                                                                                                                                                        |
| <b>Duggan EM, 2012[6]</b>      | To compare the prevalence of asthma, allergic rhinitis and eczema in two cross-sectional studies performed 5 yr apart (2002 and 2007) | School-based sample of children from Cork City, Ireland                                                                                                                                                                                                                               | ISAAC questionnaire                                     | Wheeze in the last 12 months                                                                                                                                                                                                                                             |
| <b>Fiori NS, 2012[7]</b>       | To compare asthma prevalence in two cross-sectional studies with a                                                                    | Population-based sample of adults from                                                                                                                                                                                                                                                | Brazilian version of ISAAC questions (and also included | Self-reported asthma in the last 12 months                                                                                                                                                                                                                               |

|                                        |                                                                                                                                              |                                                                                                                                                    |                                                                                             |                                                                                        |
|----------------------------------------|----------------------------------------------------------------------------------------------------------------------------------------------|----------------------------------------------------------------------------------------------------------------------------------------------------|---------------------------------------------------------------------------------------------|----------------------------------------------------------------------------------------|
|                                        | ten-year interval                                                                                                                            | Pelotas - Rio Grande do Sul, Brazil.                                                                                                               | questions from ECRHS II)                                                                    |                                                                                        |
| <b>Gomes de Luna MdF, 2013[8]</b>      | To describe the prevalences of asthma and rhinitis, comparing the results with those obtained in a prevalence survey conducted in 2006-2007. | School-based sample of adolescents from Fortaleza - Ceará, Brasil                                                                                  | ISAAC I protocol                                                                            | Wheeze in the last 12 months                                                           |
| <b>Gomes de Luna MdF, 2011[9]</b>      | To assess the prevalence of asthma and rhinitis and the association between the two conditions.                                              | School-based sample of adolescents from Fortaleza - Ceará, Brasil                                                                                  | ISAAC I protocol                                                                            | Wheeze in the last 12 months                                                           |
| <b>Gudelj I, 2012[10]</b>              | To compare intraregional prevalence of asthma                                                                                                | School base sample of adolescents from Split-Dalmatia County, Croatia                                                                              | ISAAC questions (and also included questions from ECRHS II)                                 | Wheeze in the last 12 months                                                           |
| <b>Hong S, 2012[11]</b>                | To assess the prevalence of childhood atopic dermatitis, asthma, and allergic rhinitis                                                       | School-based sample of children from Seoul, Korea                                                                                                  | ISAAC III questionnaire                                                                     | Wheeze in the last 12 months                                                           |
| <b>Jain A, 2010[12]</b>                | To assesse the prevalence of bronchial asthma and its association with socio-demographic factors                                             | Community based sample study among children aged 6-15 yr in the rural field practice area of the department of Community Medicine at KMC, Manipal. | Kannada version of ISAAC questionnaire                                                      | Wheeze in the last 12 months                                                           |
| <b>Kwon J-W, 2011[13]</b>              | To assess the prevalence of asthma and determine its risk factors                                                                            | School-base sample of children from Seoul, Japan                                                                                                   | Modified ISAAC questionnaire                                                                | Diagnosed with asthma in their lifetime and experienced wheezing in the last 12 months |
| <b>Matos Povoas Juca SCB, 2012[14]</b> | To estimate the prevalence of active asthma and identify associated risk factors.                                                            | School-based sample of adolescents from Cuiaba - Mato Grosso, Brazil.                                                                              | ISAAC I protocol and modified brazilian version of ISAAC questionnaire (one question added) | Wheeze in the last 12 months                                                           |
| <b>Robinson CL, 2012[15]</b>           | To compare the prevalence and severity of asthma in a urban and rural communities                                                            | Population-based sample of adolescents from Peru                                                                                                   | Spanish version of ISAAC questionnaire                                                      | Wheeze and/or use of asthma medication in the last 12 months                           |
| <b>Rodriguez A, 2011[16]</b>           | To explore the influence of urbanization in asthma prevalence                                                                                | Population-based sample of children and adolescents from Esmeraldas, Ecuador                                                                       | Questionnaire adapted from ISAAC II                                                         | Wheeze in the last 12 months                                                           |
| <b>Sanchez-Lerma B, 2012[17]</b>       | To investigate the prevalence of bronchial asthma and allergic diseases                                                                      | School-based sample of children from Canary Islands                                                                                                | ISAAC I protocol                                                                            | Wheeze in the last 12 months                                                           |
| <b>Toledo MF, 2011[18]</b>             | To assess the prevalence of asthma and allergies                                                                                             | School-based sample of adolescents from the city of Taubate, Sao Paulo, Brazil                                                                     | ISAAC I questionnaire                                                                       | Wheeze in the last 12 months                                                           |

## References

1. Alves GdC, Santos DN, Feitosa CA, Barreto ML: **Community violence and childhood asthma prevalence in peripheral neighborhoods in Salvador, Bahia State, Brazil.** *Cad Saude Publica* 2012, **28**:86-94.
2. Broms K, Norback D, Eriksson M, Sundelin C, Svardsudd K: **Prevalence and co-occurrence of parentally reported possible asthma and allergic manifestations in pre-school children.** *Bmc Public Health* 2013, **13**.
3. de Farias MRdC, Rosa AM, Hacon SdS, de Castro HA, Ignotti E: **Prevalence of asthma in schoolchildren in Alta Floresta- a municipality in the southeast of the Brazilian Amazon.** *Rev Bras Epidemiol* 2010, **13**:49-57.
4. Dell SD, Foty RG, Gilbert NL, Jerret M, To T, Walter SD, Stieb DM: **Asthma and allergic disease prevalence in a diverse sample of Toronto school children: results from the Toronto Child Health Evaluation Questionnaire (T-CHEQ) Study.** *Can Respir J* 2010, **17**:e1-6.
5. Delmas MC, Guignon N, Leynaert B, Annesi-Maesano I, Com-Ruelle L, Gonzalez L, Fuhrman C: **Prevalence and control of asthma in young children in France.** *Rev Mal Respir* 2012, **29**:688-696.
6. Duggan EM, Sturley J, Fitzgerald AP, Perry IJ, Hourihane JOB: **The 2002-2007 trends of prevalence of asthma, allergic rhinitis and eczema in Irish schoolchildren.** *Pediatr Allergy Immunol* 2012, **23**:464-471.
7. Fiori NS, Goncalves H, Dumith SC, Dropa Chrestani Cesar MA, Menezes AMB, Cardozo Macedo SE: **Ten-year trends in prevalence of asthma in adults in southern Brazil: comparison of two population-based studies.** *Cad Saude Publica* 2012, **28**:135-144.
8. de Luna MdFG, Fischer GB, de Luna JRG, da Silva MGC, de Almeida PC, Chiesa D: **Prevalences of asthma and rhinitis among adolescents in the city of Fortaleza, Brazil: temporal changes.** *J Bras Pneumol* 2013, **39**:128-137.
9. Luna MdFGd, Almeida PCd, Silva MGCd: **Asthma and rhinitis prevalence and co-morbidity in 13-14-year-old schoolchildren in the city of Fortaleza, Ceara State, Brazil.** *Cad Saude Publica* 2011, **27**:103-112.
10. Gudelj I, Mrkic Kobal I, Munivrana Skvorc H, Mise K, Vrbica Z, Plavec D, Tudoric N: **Intraregional differences in asthma prevalence and risk factors for asthma among adolescents in Split-Dalmatia County, Croatia.** *Med Sci Monit* 2012, **18**:PH43-50.
11. Hong S, Son DK, Lim WR, Kim SH, Kim H, Yum HY, Kwon H: **The prevalence of atopic dermatitis, asthma, and allergic rhinitis and the comorbidity of allergic diseases in children.** *Environ Health Toxicol* 2012, **27**:e2012006-e2012006.
12. Jain A, Bhat HV, Acharya D: **Prevalence of Bronchial Asthma in Rural Indian Children: A Cross Sectional Study from South India.** *Indian J Pediatr* 2010, **77**:31-35.
13. Kwon J-W, Kim B-J, Song Y, Seo J-H, Kim T-H, Yu J, Kim HB, Lee SY, Kim W-K, Kim K-W, et al: **Changes in the Prevalence of Childhood**

- Asthma in Seoul from 1995 to 2008 and Its Risk Factors.** *Allergy Asthma Immunol Res* 2011, **3**:27-33.
14. Matos Povoas Juca SCB, Takano OA, Lacerda Moraes LS, Guimaraes LV: **Asthma prevalence and risk factors in adolescents 13 to 14 years of age in Cuiaba, Mato Grosso State, Brazil.** *Cad Saude Publica* 2012, **28**:689-697.
  15. Robinson CL, Baumann LM, Gilman RH, Romero K, Manuel Combe J, Cabrera L, Hansel NN, Barnes K, Gonzalvez G, Wise RA, et al: **The Peru Urban versus Rural Asthma (PURA) Study: methods and baseline quality control data from a cross-sectional investigation into the prevalence, severity, genetics, immunology and environmental factors affecting asthma in adolescence in Peru.** *Bmj Open* 2012, **2**.
  16. Rodriguez A, Vaca M, Oviedo G, Erazo S, Chico ME, Teles C, Barreto ML, Rodrigues LC, Cooper PJ: **Urbanisation is associated with prevalence of childhood asthma in diverse, small rural communities in Ecuador.** *Thorax* 2011, **66**:1043-1050.
  17. Sanchez-Lerma B: **High Prevalence of Asthma and Allergic Diseases in Children Aged 6 and 7 Years From the Canary Islands: The International Study of Asthma and Allergies in Childhood (vol 19, pg 383, 2009).** *J Investig Allergol Clin Immunol* 2012, **22**:79-79.
  18. Toledo MF, Rozov T, Leone C: **Prevalence of asthma and allergies in 13-to 14-year-old adolescents and the frequency of risk factors in carriers of current asthma in Taubate, Sao Paulo, Brazil.** *Allergol Immunopathol (Madr)* 2011, **39**:284-290.
